# Supplementary material for: Systemically Administered Sindbis Virus in Combination with Immune Checkpoint Blockade Induces Curative Anti-tumor Immunity
Source: PubMed Central journal article supplement — Mol Ther Oncolytics. 2018 May 3;9:51–63. doi: 10.1016/j.omto.2018.04.004 (PMC6026467; doi:10.1016/j.omto.2018.04.004), 2018-05-03
Supplement: mmc1.pdf [file mmc1.pdf]

**OMTO, Volume 9**

**Supplemental Information**

**Systemically Administered Sindbis Virus  
in Combination with Immune Checkpoint  
Blockade Induces Curative Anti-tumor Immunity**

**Iris Scherwitzl, Alicia Hurtado, Carolyn M. Pierce, Sandra Vogt, Christine Pampeno, and Daniel Meruelo**

## Supplementary Data

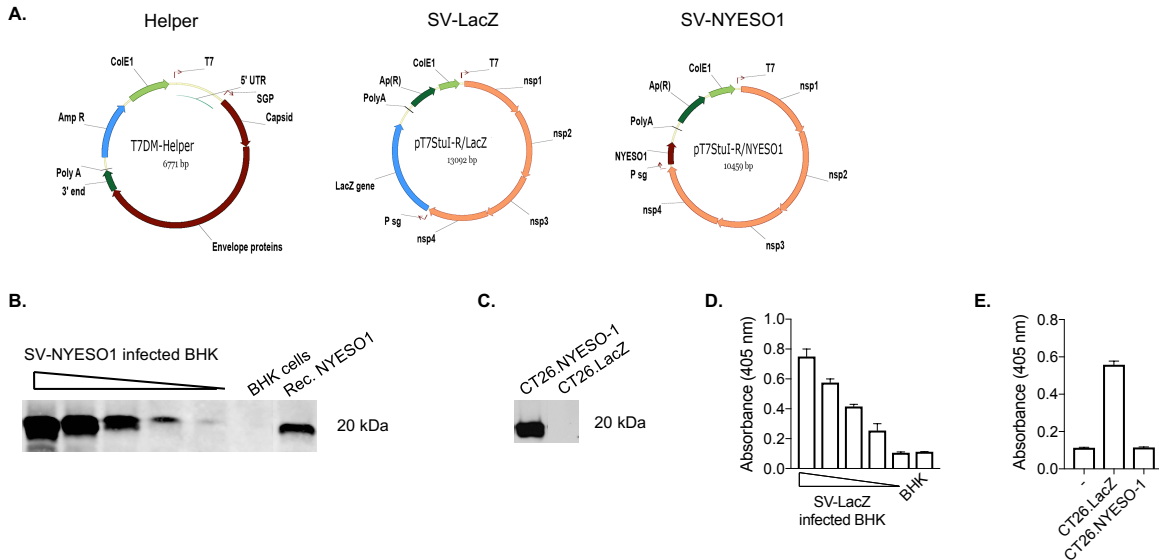

### Supplemental Figure S1. Sindbis Virus can be genetically modified to express LacZ or NYESO-1.

**A**, Map of the helper replicon, SV-LacZ and SV-NYESO-1 plasmids. **B**, To verify NYESO-1 expression of SV-NYESO1, proteins were extracted from SV-NYESO1 infected BHK cells and NYESO-1 expression was detected by Western Blot. As a positive and negative control, recombinant NYESO-1 and uninfected BHK cells were used. **C**, NYESO-1 expression in CT26.Fluc.NYESO1 was verified by Western blot. CT26.Fluc.LacZ was used as a negative control **D**, To verify LacZ expression of SV-LacZ, Protein were extracted from SV-LacZ infected BHK cells and LacZ expression was detected using the mammalian  $\beta$ -Galactosidase assay kit. As a negative control, uninfected BHK cells were used. **E**, LacZ expression of the mouse colon carcinoma cell line CT26.Fluc.LacZ was verified using the mammalian  $\beta$ -Galactosidase assay kit. As a negative control, CT26.Fluc.NYESO1 cells were used.

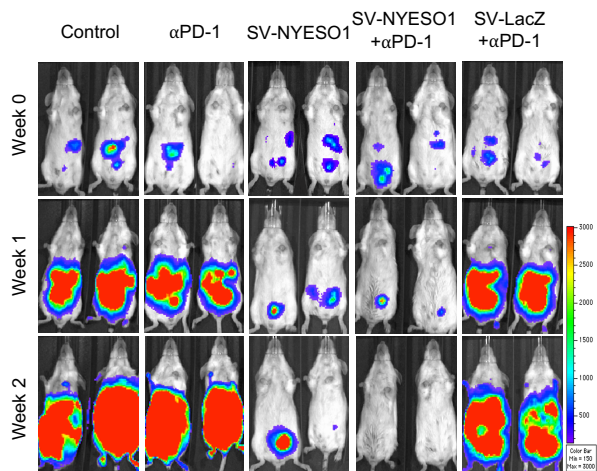

**Supplemental Figure S2. Noninvasive bioluminescence images of CT26.Fluc.NYESO1 tumor bearing mice during SV treatment.**

Representative bioluminescence images of three independent experiments showing control and treated mice bearing CT26.Fluc.NYESO1 tumors. Images were taken one day before starting SV treatment (day 0) and at weeks 1 and 2.

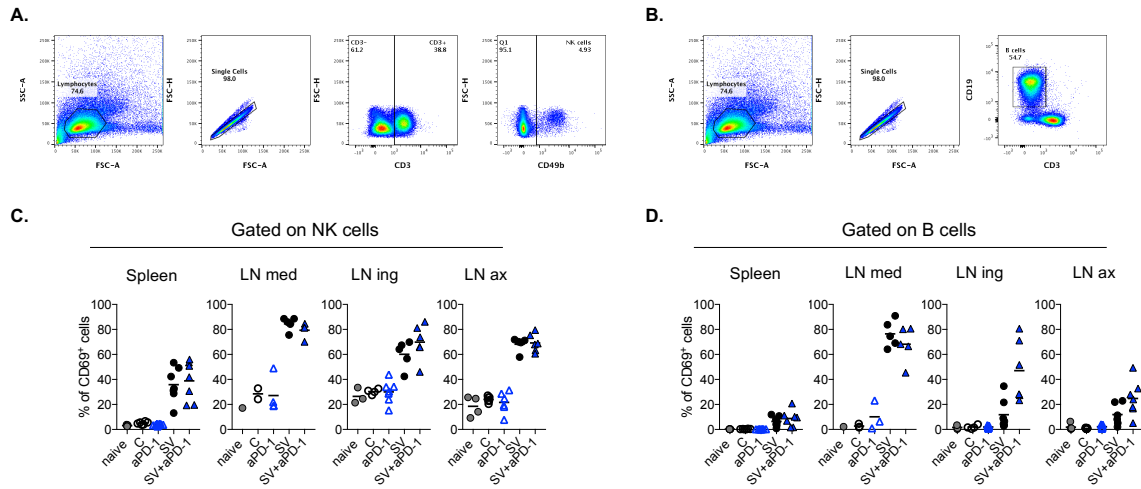

**Supplemental Figure S3. SV-NYESO1 induces an early and systemic activation of NK and B cells.**

CT26.Fluc.NYESO1 tumor cells were injected into BALB/c mice on day -4. One injection of anti-PD-1 (250  $\mu$ g) and/or SV-NYESO1 was given to the respective groups on day 0 and 1, respectively. On day 2, mice were sacrificed and organs were removed and prepared for flow cytometry analysis. **A** and **B**, Flow cytometry gating strategy to define NK cells (A) and B cells (B). **C** and **D**, Percentage of CD69 expression by NK cells (C) and B cells (D). Left to right: spleen, mediastinal (LN med), inguinal (LN ing) and axillary lymph nodes (LN ax). Results are representatives from two independent experiments. Lines represent means and statistical significance was determined with the Kurskal-Wallis test followed by the Dunns' test.

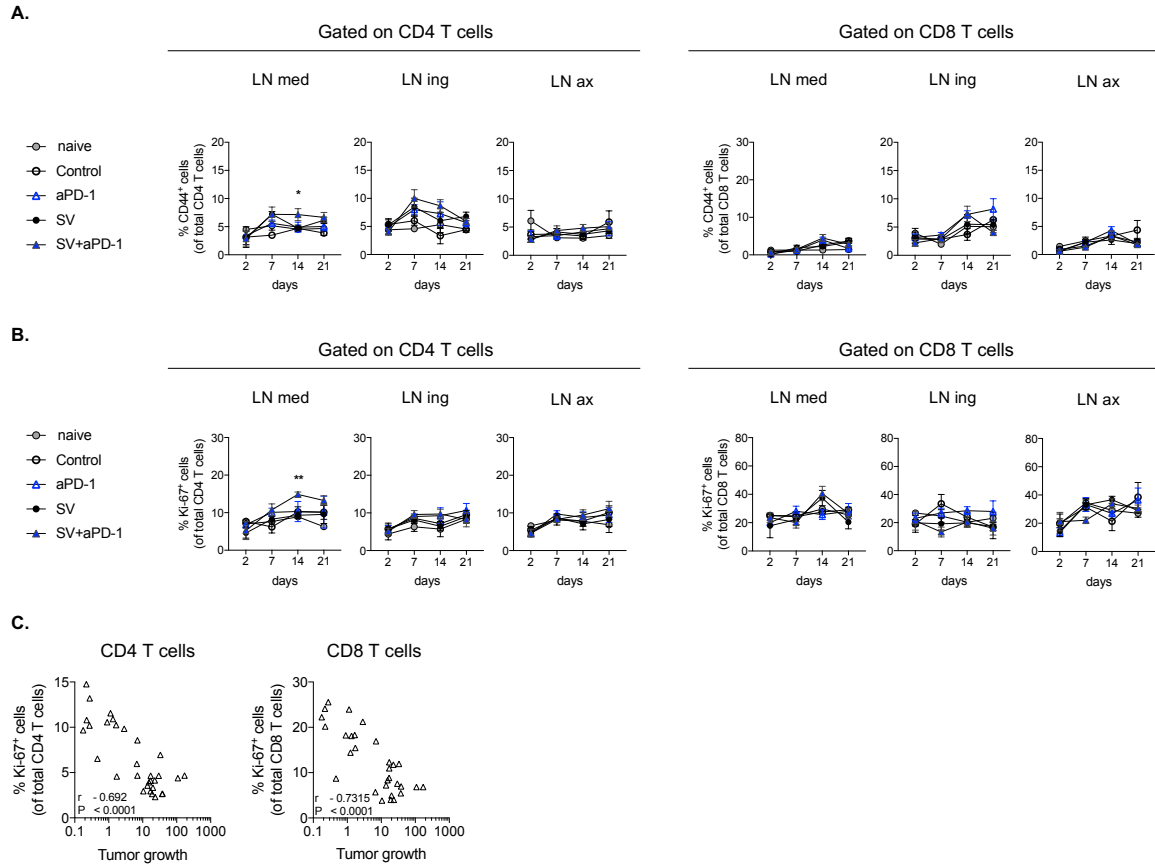

**Supplemental Figure S4. T cell activation in peripheral lymphoid organs over the course of SV-NYESO1 treatment in presence or absence of anti-PD-1.**

Tumor bearing BALB/c mice were left untreated or were treated with SV with or without anti-PD-1. Mice were sacrificed on day 2, 7, 14 or 21 to analyze the T cell immune response in spleen and mediastinal (med), inguinal (ing) and axillary (ax) lymph nodes (LN). **A** and **B**, Percentage of CD44 (A) and Ki-67 (B) expression by CD4<sup>+</sup> T cells and CD8<sup>+</sup>T cells in naive mice, as well as, control or treated tumor bearing mice using flow cytometry (n=8 mice per group). Left graphs: CD4<sup>+</sup> T cells. Right graphs: CD8<sup>+</sup> T cells. Symbols summarizing data from two independent experiments. Statistical significance between groups treated with SV in presence or absence of anti-PD-1 was determined with the Mann-Whitney test. **C**, Correlation of splenic

CD4<sup>+</sup> T cells or CD8<sup>+</sup> T cells Ki-67 expression against tumor growth on day 14 by the Spearman-rank correlation test. Results are representatives from two independent experiments. n.s > 0.05, \**P* < 0.05, \*\**P* ≤ 0.01.

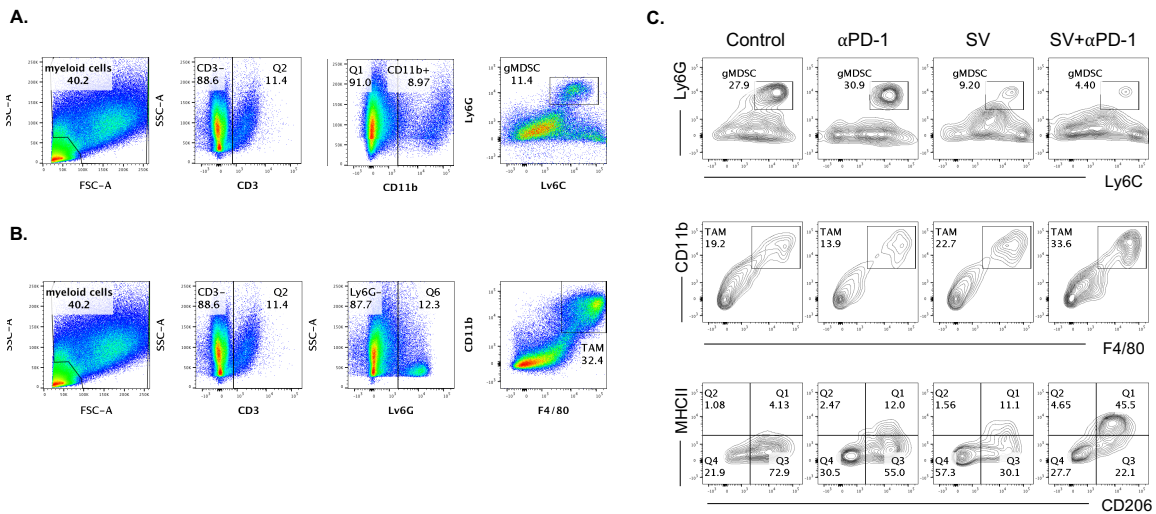

**Supplemental Figure S5. Flow cytometry gating strategy for granulocytic-myeloid derived suppressor cell and Tumor-associated macrophages in tumor.**

**A,** Gating strategy of granulocytic-myeloid derived suppressor cells (gMDSC) by flow cytometry. **B,** Gating strategy of tumor-associated macrophages by flow cytometry. **C,** Representative flow cytometry plots of the frequencies of gMDSCs, TAMs and macrophage type 2 like cells from indicated groups.

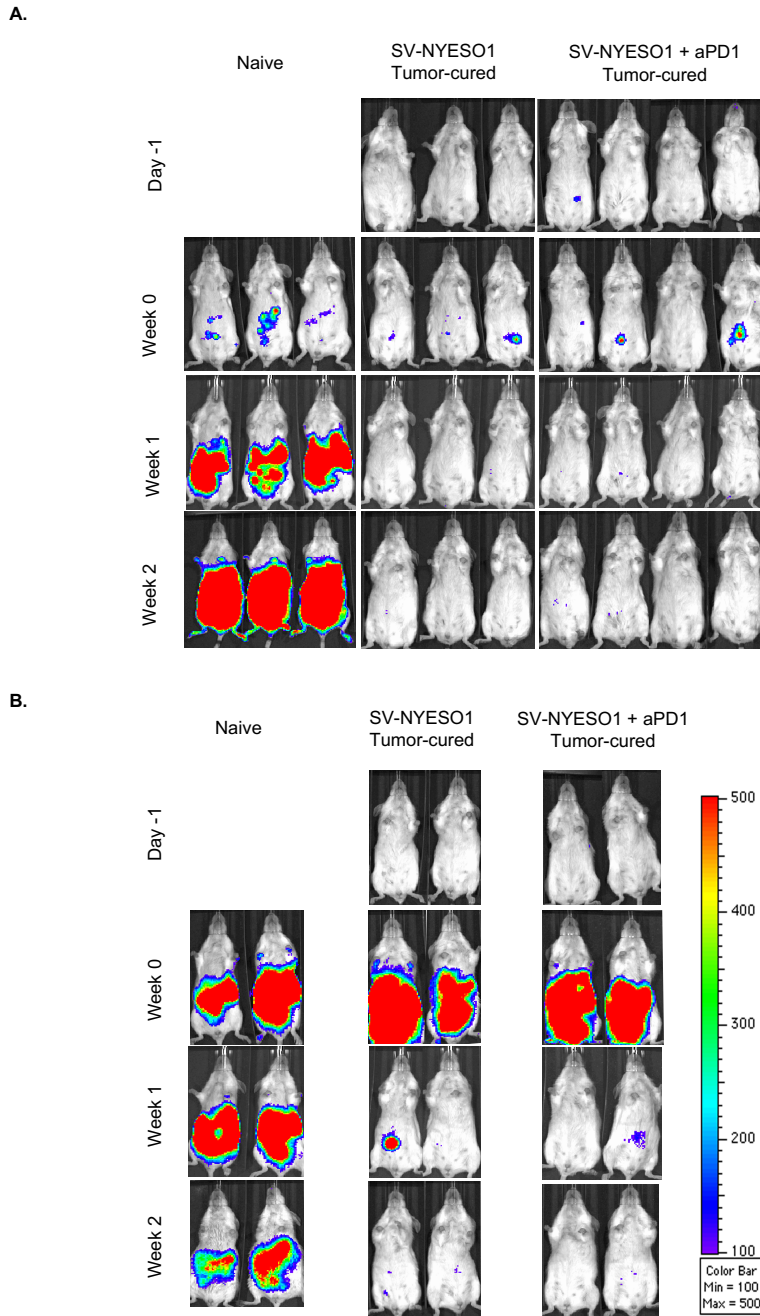

**Supplemental Figure S6. Whole body bioluminescence images of rechallenged tumor cured mice.**

Tumor cured mice were injected i.p. with  $7 \times 10^4$  CT26.Fluc.NYESO1 cells (A; n=7) or  $5 \times 10^4$  CT26.Fluc.LacZ cells (B; n=4) at 200 days after SV-NYESO1 or SV-NYESO1 with anti-PD-1

treatments. Bioluminescence was recorded one day before re-challenge for tumor cured mice as background signal control; one day after cells inoculation (Week 0) and then weekly. The scale used to prepare both figures is shown in (B).

**Supplemental Table S1. Primers and conditions for RT-PCR used to titer vectors**

| <b>cDNA ( ThermoScript <sup>TM</sup> RNaseH-reverse transcriptase (Invitrogen)</b> |                                     |                                                                   |
|------------------------------------------------------------------------------------|-------------------------------------|-------------------------------------------------------------------|
| <b>primer</b>                                                                      | <b>Sequence</b>                     | <b>cDNA Cycle</b>                                                 |
| cDNA5R                                                                             | 5'- TTTTGGAAATGTTAAAAACAAAATTTTGTTG | 2 hours at 60 °C                                                  |
| <b>QPCR ( IQ SYBR Green Supermix (BioRad))</b>                                     |                                     |                                                                   |
| <b>primer</b>                                                                      | <b>Sequence</b>                     | <b>cDNA Cycle</b>                                                 |
| 7692F                                                                              | 5'-TGATCCGACCAGCAAAACTC             | 5 min at 95 °C<br>40 x [95 °C 20 sec; 60 °C 30 sec; 72 °C 30 sec] |
| cDNA5R                                                                             | 5'- TTTTGGAAATGTTAAAAACAAAATTTTGTTG |                                                                   |



**Supplemental Table S2. FACS panel for surface markers.**

| <b>Antibody</b> | <b>Clone</b> | <b>Fluorochrome</b> | <b>Vendor</b> |
|-----------------|--------------|---------------------|---------------|
| CD3             | 17A2         | BV786               | Biolegend     |
| CD3             | 17A2         | BV605               | Biolegend     |
| CD4             | RM4-4        | PerCP-Cy5.5         | Biolegend     |
| CD8             | 53-6.7       | APC-H7              | BD Bioscience |
| CD11b           | M1/70        | BV786               | Biolegend     |
| CD11c           | N418         | PercP-Cy5.5         | Biolegend     |
| CD19            | 6D5          | PE-Cy7              | Biolegend     |
| CD44            | IM7          | BV605               | Biolegend     |
| CD49b           | DX5          | PE                  | Biolegend     |
| CD62L           | MEL-14       | Alexa Fluor 700     | Biolegend     |
| CD69            | H1.2F3       | FITC                | Biolegend     |
| Ly6C            | HK1.4        | PE-Cy7              | Biolegend     |
| Ly6G            | 1A8          | BV421               | Biolegend     |
| PD-1            | 29F.1A12     | APC                 | Biolegend     |
| PD-L1           | 10F.9G2      | PE                  | Biolegend     |
| F4/80           | T45-2342     | PE-CF594            | BD Bioscience |
| IA/IB           | M5/114.15.2  | V500                | BD Bioscience |

**Supplemental Table S3. FACS panel for intracellular staining.**

| <b>Antibody</b> | <b>Clone</b> | <b>Fluorochrome</b> | <b>Vendor</b> |
|-----------------|--------------|---------------------|---------------|
| FoxP3           | 259D/C7      | PE-CF594            | BD Bioscience |
| Ki-67           | 16A8         | BV421               | Biolegend     |
